# Supplementary material for: Nonspecific binding removal and specific binding regeneration using longitudinal acoustic waves
Source: Royal Society of Chemistry journal article supplement (doi:10.1039/c3ra42368a), 2013-01-01
Supplement: c3ra42368a.pdf [file c3ra42368a.pdf]

# Nonspecific Binding Removal and Specific Binding Regeneration Using Longitudinal Acoustic Wave

Wei-Ting Hsu<sup>1,4</sup>, Guo-Hua Feng<sup>2,3,\*</sup>, Cheng-Lung Cho<sup>2</sup>, Lai-Kwan Chau<sup>1,3,\*</sup>

<sup>1</sup>*Department of Chemistry and Biochemistry, National Chung Cheng University, Chiayi 62102, Taiwan*

<sup>2</sup>*Department of Mechanical Engineering, National Chung Cheng University, Chiayi 62102, Taiwan*

<sup>3</sup>*Center for Nano Bio-Detection, AIM-HI, National Chung Cheng University, Chiayi 62102, Taiwan*

<sup>4</sup>*Department of Natural Biotechnology, Nanhua University, Chiayi 62249, Taiwan*

\*Corresponding authors. E-mail addresses: [imeghf@ccu.edu.tw](mailto:imeghf@ccu.edu.tw) (G.-H. Feng); [chelkc@ccu.edu.tw](mailto:chelkc@ccu.edu.tw) (L.-K. Chau)

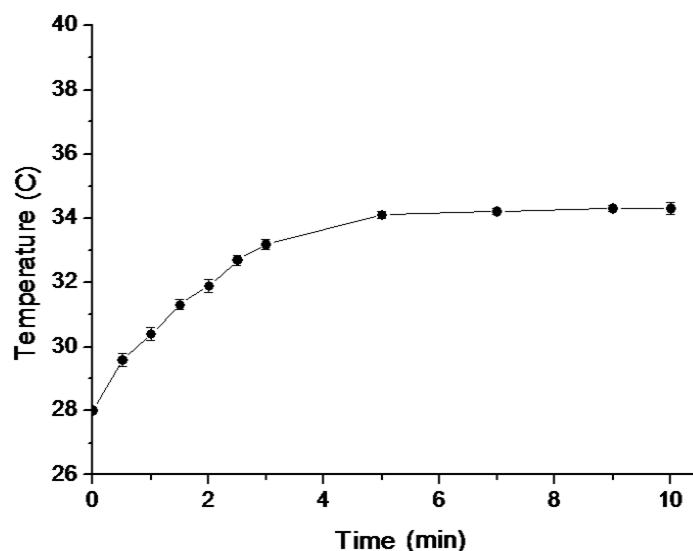

Figure S-1. Measured temperature in the LAW operation chamber versus time when the PZT transducer is activated ( $n = 3$ ). LAW voltage = 50 V<sub>rms</sub>; LAW frequency: from 100 kHz to 1 MHz.

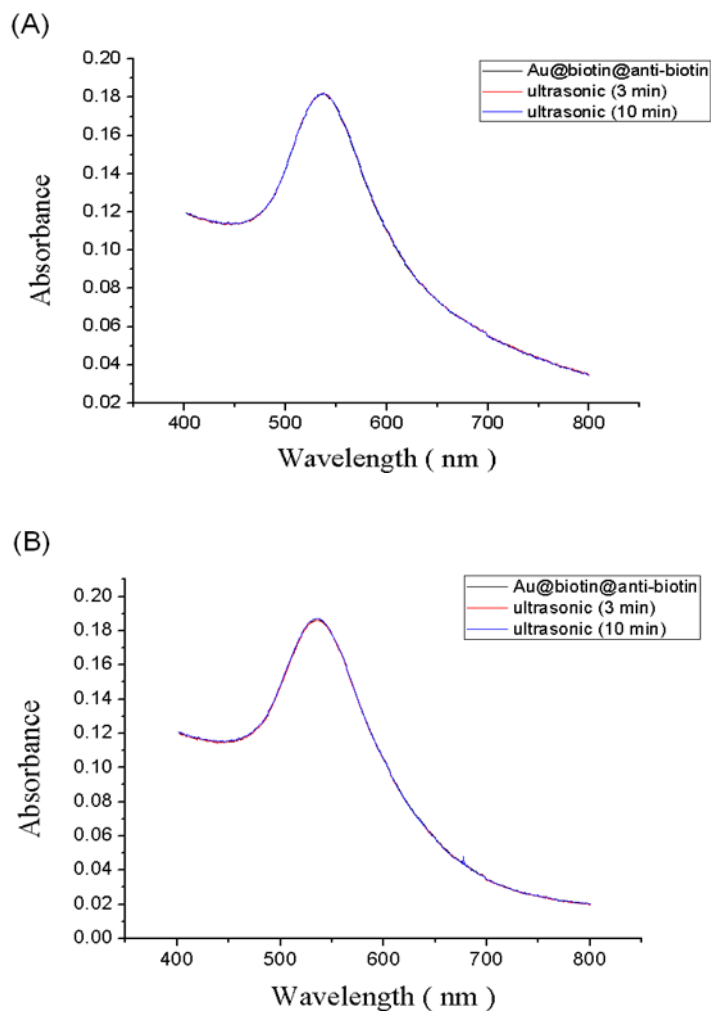

Figure S-2. Controlled experiments: biotin-functionalized GNP-GSCs with pre-adsorbed anti-biotin were immersed in a commercially available ultrasonic bath. Absorbance spectra of (a) initial GNP-GSC with pre-adsorbed anti-biotin (black line), (b) GNP-GSCs with pre-adsorbed anti-biotin after ultrasonic activation for 3 min (red line), and (c) GNP-GSCs with pre-adsorbed anti-biotin after ultrasonic activation for 10 min (blue line).
